# Supplementary material
Source: ML conference proceedings conference paper supplement (https://www.ecva.net/papers/eccv_2020/papers_ECCV/html/123710545_ECCV_2020_paper.php)
Supplement: Supplementary file 3 [file 123710545-supp.zip]

Archive with 10 entries (7 files):
- 5480-supp/
- 5480-supp/.DS_Store
- __MACOSX/
- __MACOSX/5480-supp/
- __MACOSX/5480-supp/._.DS_Store
- 5480-supp/evolution_CelebA-HQ_v3.mp4
- __MACOSX/5480-supp/._evolution_CelebA-HQ_v3.mp4
- 5480-supp/5480-supp.pdf
- __MACOSX/5480-supp/._5480-supp.pdf
- __MACOSX/._5480-supp
